## **Compensatory mechanisms affect sensorimotor integration during ongoing vocal-motor acts in marmoset monkeys**

Thomas Pomberger<sup>1,2,3</sup>, Julia Löschner<sup>1,3</sup>, Steffen R. Hage<sup>1,\*</sup>

<sup>1</sup>Neurobiology of Vocal Communication, Werner Reichardt Centre for Integrative Neuroscience, University of Tübingen, Otfried-Müller-Str. 25, 72076 Tübingen, Germany

<sup>2</sup>Graduate School of Neural & Behavioural Sciences - International Max Planck Research School, University of Tübingen, Österberg-Str. 3, 72074 Tübingen, Germany

<sup>3</sup>These authors contributed equally

\*correspondence to [steffen.hage@uni-tuebingen.de](mailto:steffen.hage@uni-tuebingen.de)

## 1 **Abstract**

2 In vertebrates, any transmission of vocal signals faces the challenge of acoustic  
3 interferences such as heavy rain, wind, animal, or urban sounds. Consequently, several  
4 mechanisms and strategies have evolved to optimize the signal-to-noise ratio. Examples to  
5 increase detectability are the Lombard effect, an involuntary rise in call amplitude in  
6 response to masking ambient noise, which is often associated with several other vocal  
7 changes such as call frequency and duration, as well as the animals' capability of limiting  
8 calling to periods where noise perturbation is absent. Previous studies revealed rapid vocal  
9 flexibility and various audio-vocal integration mechanisms in marmoset monkeys. Using  
10 acoustic perturbation triggered by vocal behavior, we investigated whether marmoset  
11 monkeys are capable of exhibiting changes in call structure when perturbing noise starts  
12 after call onset or whether such effects only occur if noise perturbation starts prior to call  
13 onset. We show that marmoset monkeys are capable of rapidly modulating call amplitude  
14 and frequency in response to such perturbing noise bursts. Vocalizations swiftly increased  
15 call frequency after noise onset indicating a rapid effect of perturbing noise on vocal motor  
16 pattern production. Call amplitudes were also affected. Interestingly, however, the  
17 marmosets did not exhibit the Lombard effect as previously reported but decreased their call  
18 intensity in response to perturbing noise. Our findings indicate that marmosets possess a  
19 general avoidance strategy to call in the presences of ambient noise and suggest that these  
20 animals are capable of counteracting a previously thought involuntary audio-vocal  
21 mechanism, the Lombard effect, presumably via cognitive control processes.

## 22 **Keywords**

23 Audio-vocal integration; *Callithrix jacchus*; primate communication; vocal communication;  
24 vocal flexibility

## 25 **Introduction**

26 Communication between individuals is a crucial aspect for evolutionary success and appears  
27 in various forms in nature ranging from olfactory [1,2] to visual [3] to vocal signals [4]. For  
28 proper communication, the transmission of a signal sent out by a sender has to be detected  
29 and decoded by one or more receivers [5]. Therefore, the sender has to be able to modulate  
30 the signal in response to potential masking ambient noise to ensure proper signal  
31 transmission. For vocal communication in vertebrates, several mechanisms have evolved to  
32 compensate for masking acoustic interferences, such as heavy rain, wind, animal, or urban  
33 sounds, leading to changes in temporal and spectral features of the vocal signals [6]. Such  
34 vocal modifications can happen involuntarily as well as under volitional control.

35 One of the most efficient mechanisms to increase signal-to-noise ratio in call production is  
36 the so-called Lombard effect, i.e., the involuntary increase in call amplitude in response to  
37 masking ambient noise [7]. It is often accompanied by a shift in call frequency[8,9] as well as  
38 a change in call duration [10,11] and has been shown in many vertebrate species from fish  
39 to frogs to birds to mammals including humans [12,13], suggesting that the Lombard effect is  
40 an evolutionary old behavior that may have emerged about 450 million years ago. Another  
41 successful strategy to increase detectability in a noisy environment is the restraint of call  
42 emission to timeslots where noise perturbation is low or absent [10,14,15]. This approach  
43 renders the modification of call parameters unnecessary and avoids the increased  
44 physiological cost of call emission at high intensities that might still be insufficiently  
45 increasing signal-to-noise ratio.

46 The common marmoset, a small, highly vocal New World monkey indigenous to the dense  
47 rainforests of Brazil, has been shown to exhibit vocal flexibility, such as increasing call  
48 intensity [16,17] or increasing the duration of specific calls [17], as well as the attempt to call  
49 in silent gaps [14], in the presence of perturbing ambient noise. These findings suggest that  
50 while these animals generally seem to prefer avoiding calling in a noisy environment, they do  
51 exhibit the involuntary audio-vocal effects discussed above when doing so. This idea is

52 supported by a recent study showing that marmoset tend to produce single calls instead of  
53 call sequences in response to perturbing noise stimuli [18]. Interestingly, marmoset monkeys  
54 are also capable of interrupting ongoing vocalizations rapidly after noise perturbation onset  
55 [18], overturning decades-old concepts regarding vocal pattern generation [19–21],  
56 indicating that vocalizations do not consist of one discrete call pattern but are built of many  
57 sequentially uttered units that might be modulated and initiated independently of each other.  
58 However, it is yet unclear whether audio-vocal mechanisms, such as the Lombard effect and  
59 its accompanied changes in call frequency, can be rapidly elicited in cases where the  
60 perturbing noise starts after call onset or whether such effects only occur if noise  
61 perturbation starts prior to call onset.

62 In the present study we use acoustic perturbation triggered by the vocal behavior itself to  
63 test in a controlled experimental design whether marmosets are capable of rapidly  
64 modulating distinct vocal parameters such as call frequency and amplitude in ongoing  
65 vocalizations. Performing quantitative measures of resulting adjustments, we show that  
66 marmoset monkeys are able to specifically and rapidly modulate call frequency and  
67 amplitude as a response to white noise stimuli in ongoing vocal utterances. Hereby, our data  
68 indicate that marmosets exhibit a decrease in call amplitude as a result of such noise  
69 perturbation, suggesting a mechanism counteracting the rise in amplitude caused by the  
70 Lombard effect.

## 71 **Results**

72 We measured vocal behavior in marmoset monkeys (*Callithrix jacchus*,  $n = 4$ ), a highly vocal  
73 New World monkey species, while separated in a soundproofed chamber, with and without  
74 acoustic perturbation (**Fig. 1A and B**). In this setting, marmoset monkeys predominantly  
75 produced phee calls (monkey H: 92.0%, S: 99.1%, F: 96.8%, W: 95.6%), long-distance  
76 contact calls, composed of one (so-called single phees), two (double phees), or more phee  
77 syllables, to interact with conspecifics [22] (**Fig. 1C**). Other call types such as trill-phees,  
78 twitters, trills, tsik-ekks [22,23], and segmented phees [24] were rarely uttered (all other call  
79 types were well below 2.5% in all monkeys except trill-phees in monkey H [4.6%]).

80 We perturbed 2/3 of calls with noise playback after vocal onset to ensure perturbation  
81 starting after call initiation (**Fig. 1B**). To investigate whether perturbation of different  
82 frequency bands within the hearing range of the monkeys has different effects on their vocal  
83 behavior, we played back five different noise band conditions (broadband noise and  
84 bandpass filtered noise bands below [0.1–5 kHz], around [5–10 kHz], or above the  
85 fundamental frequency of phee calls [noise bands of 10–15 kHz and 16–21 kHz] at four  
86 different amplitudes [50 dB, 60 dB, 70 dB, 80 dB] each). All noise conditions were played  
87 back pseudo-randomly in blocks of 30 uttered vocalizations, resulting in 20 calls being  
88 perturbed by noise after call onset and 10 calls not being perturbed by noise (control). In  
89 total, our monkeys produced 6,298 phees (monkey F = 1544 phees, H = 1471, S = 1631, W  
90 = 1652). Monkeys uttered mostly single and double phees (multi-syllabic phees with more  
91 than two syllables were rare or absent: monkey F = 6.5%, H = 0.4%, S = 1.3%, absent in W),  
92 with double phee rates between 8.4% and 55.5% (mean:  $29.5\% \pm 9.8\%$ ,  $n = 4$  monkeys) in  
93 the control condition.

94 We first investigated if and how marmosets changed the fundamental frequency of their  
95 ongoing phee syllables when perturbed by different noise conditions. We found an increase  
96 in first syllable frequencies ( $F(3,4904)=6.42$ ,  $p=2.0e-04$  for amplitude,  $F(4,4904)=20.68$ ,  
97  $p<0.0001$  for frequency,  $n=3180$ ). Those frequency shifts were significant in the 0.1–5.1 kHz

98 at 80 dB noise condition ( $38.5 \pm 13.8$  Hz,  $p=1.02e-02$ ,  $n=168$ ), in the two loudest conditions of  
99 the 5–10 kHz noise band (70 dB:  $56.9 \pm 14.5$  Hz,  $p=3.20e-03$ ,  $n=165$ ; 80 dB:  $76.7 \pm 16.4$  Hz,  
100  $p=4.12e-08$ ,  $n=134$ ), and in all four amplitude conditions of broadband noise (50 dB:  
101  $39.2 \pm 13.7$  Hz,  $p=5.03e-10$ ,  $n=159$ ; 60 dB:  $68.6 \pm 13.4$  Hz,  $p=1.21e-08$ ,  $n=143$ ; 70 dB:  
102  $104.1 \pm 12.5$  Hz,  $p=3.99e-13$ ,  $n=135$ ; 80 dB:  $101.7 \pm 16.1$  Hz,  $p=1.66e-20$ ,  $n=118$ ; control:  
103  $n=1733$ ; **Fig. 2A**). The largest frequency shift could be observed for 70 dB broadband noise,  
104 while in the next higher intensity condition (80 dB), there was no further increase in  
105 frequency ( $p=1$ ,  $n=253$ ), indicating that marmosets are only capable of altering their  
106 fundamental frequency within a certain range. Frequency shifts were not observed in calls  
107 that were produced during 10–15 kHz and 16–21 kHz noise band perturbations ( $p=1$ ,  $n=669$   
108 for the 10–15 kHz noise band,  $n=652$  for the 16–21 kHz noise band, **Fig. 2A**). Second phee  
109 syllables showed no significant shift in fundamental frequencies when perturbed by noise  
110 ( $F(3,1343)=1.56$ ,  $p=0.20$  for amplitude,  $F(4,1343)=1.24$ ,  $p=0.29$  for frequency,  $n=761$  , **Fig.**  
111 **2B**).

112 Next, we quantified the magnitude of the observed frequency shifts by calculating population  
113 effect sizes (ES) of the factors frequency ( $ES_{\text{freq}}$ ), amplitude ( $ES_{\text{ampl}}$ ), and the combination of  
114 both conditions ( $ES_{\text{freq} \times \text{ampl}}$ ) according to Cohen (1992) (see Material and Methods). An  
115 effect would be given if the corresponding ES value of a factor was above the threshold of  
116 0.02 as suggested by Cohen (1992). We found  $ES_{\text{freq} \times \text{ampl}}$  values of 0.035 for first syllables  
117 and 0.019 for second syllables, indicating an effect for first syllables (**Fig. 2A and 2B**).  $ES_{\text{freq}}$   
118 for the first syllable was above the threshold ( $ES_{\text{freq}}=0.023$ ), while  $ES_{\text{ampl}}$  was below  
119 ( $ES_{\text{ampl}}=0.01$ ), indicating that the shifts in fundamental frequency were mainly correlated with  
120 the different noise rather than amplitude conditions.

121 We then tested how fast fundamental frequency shifts occurred within the first phee syllables  
122 after noise onset. Therefore, we plotted the mean fundamental frequency courses starting at  
123 noise onset times (**Fig. 2C and fig. S5**). The shortest latency of fundamental frequency  
124 shifts within a noise condition was defined as the moment where fundamental frequency

125 shifts were significant for a minimum of five consecutive milliseconds after noise onset.  
126 Shortest latencies were found for the 0.1–5.1 kHz noise condition at 80 dB (33 ms, n=168)  
127 and all broadband conditions (50 dB: 29 ms, n=159; 60 dB: 34 ms, n=143; 70 dB: 25 ms,  
128 n=135; 80 dB: 25 ms, n=118), resulting in a mean latency of  $29.2 \pm 1.9$  ms.

129 Subsequently, we investigated how call amplitudes changed in response to noise  
130 perturbation. We calculated mean amplitude shifts after noise onset for first and second  
131 phee syllables (**Fig. 3A and fig. 3B**). We found a significant decrease in call amplitude for  
132 first phee syllables ( $F(3,3084)=1.01$ ,  $p=0.39$  for amplitude,  $F(4,3084)=5.3$ ,  $p=0.0003$  for  
133 frequency,  $n=2019$ ). These shifts were significant for the two middle intensity levels of the  
134 0.1–5.1 kHz noise (60 dB:  $-1.7 \pm 0.5$  dB  $p=3.28e-03$ ,  $n=103$ ; 70 dB:  $-2.7 \pm 0.5$  dB,  $p=8.17e-04$ ,  
135  $n=119$ ) as well as for the two middle intensity levels of the broadband noise (60 dB:  $-2.3 \pm 0.6$   
136 dB,  $p=5.15e-03$ ,  $n=93$ ; 70 dB:  $-2.0 \pm 0.6$  dB,  $p=8.59e-04$ ,  $n=85$ ). However, we could not find  
137 any systematic increase in amplitude shifts or significant amplitude shifts in any of the five  
138 noise conditions ( $n=3093$ ; **Fig. 3A**). Furthermore, the combined effect size ( $ES_{\text{freq} \times \text{amp}}=0.024$ )  
139 was above 0.02 while the effect size for the frequency ( $ES_{\text{freq}}=0.014$ ) and  
140 amplitude ( $ES_{\text{amp}}=0.007$ ) factors were below 0.02, indicating that noise perturbation of  
141 ongoing first syllables has only a small or no effect on amplitude shifts.

142 However, there was also an amplitude decrease in second phee syllables ( $F(3,350)=3.76$ ,  
143  $p=0.011$  for amplitude,  $F(4,950)=1.71$ ,  $p=0.15$  for frequency,  $n=554$ ). The amplitude shifts in  
144 the 0.1–5.1 kHz and 5–10 kHz noise conditions were significant at the highest intensity  
145 levels ( $-7.2 \pm 1.3$  dB,  $p=3.90e-02$ ,  $n=19$  and  $-7.9 \pm 3.1$  dB,  $p=2.68e-03$ ,  $n=16$ , respectively; **fig.**  
146 **3B**). Monkeys decreased their call amplitudes in these two conditions with increasing noise  
147 intensity levels while no significant call amplitude changes were observed in the other three  
148 conditions. All three ES values were above 0.02 ( $ES_{\text{freq} \times \text{amp}}=0.064$ ,  $ES_{\text{freq}}=0.030$ ,  
149  $ES_{\text{amp}}=0.024$ ) suggesting an effect of specific noise perturbation on amplitude shifts of  
150 second phee syllables in marmoset monkeys. Although it has been already shown that  
151 marmoset monkeys show the Lombard effect while producing twitter calls[17], our results

152 might indicate that marmoset monkeys do not exhibit this reflex when producing phee calls  
153 or suppress it and lower their call intensities instead.

154 To test whether our animals are able to show a Lombard effect or suppress it in a noisy  
155 environment in general when producing phee calls, we modified our behavioral experiment  
156 scheme. We played back all five noise conditions [0.1–5 kHz, 5–10 kHz, 10–15 kHz, 16–21  
157 kHz, and broadband] at 70 dB SPL amplitude intensity plus two control conditions with a  
158 duration of 180 s each, resulting in a block of seven pseudorandomized playback conditions  
159 with a total duration of 1260 s. In this new experiment our monkeys produced a total of 803  
160 phee calls (monkey F = 222 phees, H = 270, S = 158, W = 153), which were more commonly  
161 uttered (F = 82.5%, H = 80.4%, S = 84.0%, W = 100%) than other produced call types. The  
162 relative amounts of single phees ranged between 34.8% and 56.3% and the relative  
163 amounts of double phees ranged between 43.71% and 59.49%. Multi-syllabic phees (F =  
164 0.5%, H = 1.9%, S = 5.7%, W = 0%) and segmented phees (F = 0.4%, H = 2.4%, S = 0%, W  
165 = 0%) were nearly absent. Monkey H produced 14.3% trill-phees and monkeys F and S  
166 produced 15.2% and 13.8% tsik-ekks, respectively. All other call types were below 2.5% for  
167 all monkeys. Under these experimental conditions we found that monkey W significantly  
168 increased its call intensity for both phee syllables when perturbed by noise (first syllable:  
169  $6.4 \pm 0.8$  dB,  $p=1.57e-03$ ,  $n=107$ ; second syllable:  $8.4 \pm 0.9$  dB,  $p=6.52e-03$ ,  $n=46$ ; **fig. 3C and**  
170 **fig. S6**), thus, exhibiting the Lombard effect. Furthermore, monkey S significantly decreased  
171 the intensity of the second phee syllable and exhibited no changes in call intensity of the first  
172 syllable (second syllable:  $-4.2 \pm 1.0$  dB,  $p=2.15e-03$ ,  $n=52$ ; first syllable:  $p=0.10$ ,  $n=68$ ) while  
173 monkeys F and H showed no significant amplitude change under noise perturbation (first  
174 syllable (H):  $p=0.89$ , second syllable (H):  $p=0.15$ ,  $n=234$  ; first syllable (F):  $p=0.91$ , second  
175 syllable (F):  $p=0.06$ ,  $n=184$ ). Taken together, the present results suggest that marmosets are  
176 capable of exhibiting as well as actively suppressing the Lombard effect in a noisy  
177 environment during phee call production.



178 **Discussion**

179 Our results demonstrate that marmoset monkeys show rapid modulation of call parameters  
180 in response to perturbing noise bursts presented after call onset. Ongoing phee  
181 vocalizations perturbed by ambient noise rapidly increased call frequency in cases where the  
182 fundamental frequency was above or directly masked by the perturbing noise. Bandpass-  
183 filtered noise bursts, which did not mask but were above the fundamental frequencies of the  
184 calls, had no effect on call frequency. Additionally, call amplitudes of phee calls were  
185 affected by low frequency noise bands and broadband noise. Surprisingly, phee calls  
186 perturbed after call onset did not exhibit a Lombard effect as previously reported for calls  
187 that were produced in constantly presented ambient noise [17,25]. Instead, our monkeys  
188 decreased their call intensity in a stepwise function with increasing noise intensity. Our  
189 findings suggest a general strategy of avoiding calling in a noisy environment in marmoset  
190 monkeys.

191 **Effects of ambient noise on call frequency.** Noise-dependent shifts in call frequency are  
192 not well-studied and relatively poorly understood. Only a few studies have reported a rise in  
193 call frequencies with increasing amplitudes of ambient noise in birds and bats [8,9,26] and  
194 only one study investigated the effect of different noise bands on call frequencies. In bats,  
195 the frequencies of echolocation calls increased significantly for a variety of noise stimuli no  
196 matter whether they were directly masking the call's fundamental frequency or presented  
197 below the dominant call frequency [8]. In contrast, the present study shows that in  
198 marmosets, call frequency was predominantly only affected when we directly masked the  
199 calls fundamental frequency. As a result, the strongest rise in call frequencies were found for  
200 high noise amplitudes. These findings suggest that the observed rises in call frequencies are  
201 an audio-vocal mechanism elicited to increase call detectability in a noisy environment, as  
202 has been found in previous studies involving birds [27–29]. Here, it has been predicted that  
203 shifts in song frequencies of about 200 Hz increase call detectability by about 10 to 20%  
204 [28], which is mainly due to the fact that the spectrum of environmental noise generally

205 shows a decay in amplitude with increasing frequency [28–31]. In the present study, shifts in  
206 call frequency occurred with a mean latency of about 30 ms after noise onset suggesting a  
207 rapid underlying neural mechanism for frequency modulation. Such fast responses to  
208 ambient noise have yet only been found in echolocating bats, which exhibit an increase in  
209 call amplitude in about 30 ms after noise onset as well [32].

210 **Effects of ambient noise on call amplitude.** Despite the positive effect of rises in call  
211 frequency on signal detectability, the most effective mechanism to improve signal to noise  
212 ratio in a noisy environment during vocal production is the Lombard effect, i.e., the  
213 involuntary rise in call amplitude as a response to masking noise [12,13]. In the present  
214 study, noise perturbation starting after phee call onset had no systematic effect on call  
215 amplitude of the first syllable, i.e., the syllable during which noise perturbation started. In  
216 cases in which significant shifts occurred, call amplitude did not increase, as expected, but  
217 decreased with small effect sizes. This effect was stronger for the second syllables of the  
218 phee calls, in which a strong decrease in call amplitude could be observed for low frequency  
219 noise conditions. Consequently, call intensity decreased in a stepwise function with  
220 increasing noise intensity suggesting a direct effect of noise intensity on call amplitude. In  
221 contrast to our study, the Lombard effect has been observed in marmoset monkeys in a  
222 previous study [17]. This apparent discrepancy might be explained by the different call types  
223 that were investigated in both studies. While we focused on phee calls, a high amplitude call  
224 that is produced at the upper end of the amplitude scale [16], the earlier study investigated  
225 the twitter call, a vocalization that is produced at lower amplitude intensities [17].

226 Our results suggest an audio-vocal integration mechanism in marmoset monkeys that is  
227 capable of counteracting the Lombard effect. Such a mechanism has been already shown to  
228 exist in vocal production learners such as birds and humans [33–36] and seems to be mainly  
229 driven by higher-order cognitive processes including cortical structures [13].

230 **Vocal flexibility during perturbing noise in marmoset monkeys.** Current studies have  
231 revealed a high degree of vocal flexibility in marmoset monkeys [37], allowing them to

232 control when[14], where[38], and what to vocalize[39]. In addition, recent studies revealed  
233 that marmosets are able to modulate distinct call parameters in response to acoustic  
234 feedback [18,40]. This vocal flexibility allows marmosets to avoid calling in the presence of  
235 environmental noise and predominantly initiate their vocalizations in silent periods [14]. In a  
236 previous study, we demonstrated that marmosets interrupt their vocalizations shortly after  
237 noise onset when perturbation starts after vocal onset [18], supporting the idea that these  
238 animals tend to avoid calling in ambient noise. Such call interruptions, however, were rare  
239 (2.6% of all calls), indicating stark neuronal and/or anatomical constraints in exhibiting such  
240 behavior [18] and resulting in a large fraction of phee calls being perturbed by noise bursts.  
241 In the present study, we show that the call amplitude of such vocalizations are lower.

242 We suggest that marmoset monkeys exhibit this vocal behavior in a noisy environment to  
243 reduce the physiological costs of high intensity phee calls. Marmoset phee calls are elicited  
244 at high intensities above 100 dB SPL, resulting in high muscle tensions encompassing  
245 almost the entire animal's body during call production (own observation). Therefore,  
246 mechanisms might have evolved in these animals that ensure the proper transmission of  
247 these high energetic calls resulting in calling in silent gaps and decreasing call intensity in  
248 situations in which sufficient detectability might be potentially diminished, such as during the  
249 presence of ambient noise.

#### 250 **Mechanisms counteracting involuntary audio-vocal effects need cognitive control.**

251 Based on the current work and earlier studies [14,18], we propose a hypothetical neuronal  
252 model suggesting various audio-vocal control mechanism involving cortical, subcortical, and  
253 corticofugal connections capable of modulating vocal behavior in a noisy environment (**Fig.**  
254 **4**). In accordance to earlier work [41,42], our model consists of a volitional articulatory motor  
255 network originating in the prefrontal cortex (PFC) cognitively controlling vocal output of a  
256 phylogenetically conserved primary vocal motor network predominantly consisting of a  
257 subcortical neuronal network. The vocal motor network can be modulated by auditory  
258 structures on several cortical and subcortical brain levels [13]. The decision to initiate or

259 suppress a call, as well as counteracting an involuntary effect (Lombard effect), needs  
260 cognitive control. The ability to interrupt calls or modulate call parameters as a response to  
261 perturbing noise might be controlled by both subcortical mechanisms and corticofugal  
262 projections. Neurophysiological studies will now have to elucidate at which brain levels  
263 audio-vocal integration mechanisms exist that explain the observed capabilities of marmoset  
264 monkeys to counteract a previously thought involuntary audio-vocal mechanism, the  
265 Lombard effect.

## 266 **Material and Methods**

267 ***Animal Housing and Maintenance.*** Four adult marmoset monkeys (*Callithrix jacchus*) were  
268 used in the present study. Monkeys were usually kept in different sex pairs and were all born  
269 in captivity. The animals had *ad libitum* access to water and were fed on a restricted food  
270 protocol including a daily basis of commercial pellets, fruits, vegetables, mealworms, and  
271 locusts. Additional treats, such as marshmallows or grapes, were used as positive  
272 reinforcements to transfer the animals from their home cage to the experimental cage.  
273 Environmental conditions in the animal husbandry were maintained at a temperature of  
274 26°C, 40-60% relative humidity, and a 12h:12h day/night cycle. All animal handling  
275 procedures were in accordance with the guidelines for animal experimentation and  
276 authorized by the national authority, the Regierungspräsidium Tübingen. All vocalizations  
277 analyzed in this study are a fraction of calls that have been recorded in a previous study  
278 (Pomberger et al. 2018).

279 ***Experimental Setup and Procedure.*** The vocal behavior of four animals was recorded in a  
280 soundproof chamber in response to noise playback that was initiated after vocal onset as  
281 reported earlier (Pomberger et al., 2018). Briefly, the animals were transferred into a  
282 recording cage (0.6 x 0.6 x 0.8 m), which was placed in a soundproofed chamber, with *ad*  
283 *libitum* access to water and food pellets throughout the recording period. In this behavioral  
284 setup, marmoset monkeys predominantly produce phee calls to interact with conspecifics  
285 (phee ratio within all uttered calls; monkey S: 99.1 %, H: 92.0 %, W: 95.6 %, F: 96.8 %).  
286 Other call types such as trill-pees, twitter, trills, tsik-ekks [22], or segmented pees [24]  
287 were only rarely uttered (ratios were well below 2.5% for all other call types in all monkeys  
288 except trill-pees in monkey H [4.6 %]). Monkeys produced a mean of 118±9 (monkey S),  
289 167±31 (H), 117±10 (W), and 87±7 (F) phee calls per session. The vocal behavior of each  
290 individual monkey was recorded once a day in sessions ranging between one and two hours  
291 in duration. Data were collected in sessions at various times during the day between 11 am  
292 and 5 pm. Recordings were performed for 10–28 days (mean: 17±3 days) for each individual

293 animal. The monkey's behavior was constantly monitored and observed with a video camera  
294 (ace acA1300-60gc, Basler, Germany with 4.5–12.5 mm CS-Mount Objective H3Z4512CS-  
295 IR 1/2, Computar, Japan) placed on top of the cage and recorded with standard software  
296 (Ethovision XT version 4.2.22, Noldus, the Netherlands). The vocal behavior was collected  
297 with eight microphones (MKH 8020 microphone with MZX 8000 preamplifier, Sennheiser,  
298 Germany), which were positioned in an octagonal design around the cage (**Fig. 1A**),  
299 digitized using an A/D interface (Octacapture, Roland, Japan; sample rate: 96 kHz), and  
300 recorded using standard software (Avisoft-Recorder, Avisoft Bioacoustics, Germany). A  
301 custom-written program (OpenEX, Tucker-Davis Technologies, U.S.A.) running on a  
302 workstation (WS-X in combination with an RZ6D multi I/O processor, Tucker-Davis  
303 Technologies, U.S.A.) monitored the vocal behavior in real-time via an additional  
304 microphone (MKH 8020 microphone with MZX 8000 preamplifier, Sennheiser, Germany)  
305 placed on top of the cage, which automatically detected vocalizations through online  
306 calculation of several acoustic parameters, such as call intensity, minimum duration of call  
307 intensity duration, call frequency, and several spectral features. The median vocal detection  
308 rate was well above 99% and three out of four vocalizations were detected within the first  
309 146 ms after call onset (**Fig. 1B**).

310 The eight microphones positioned around the cage were installed to ensure precise  
311 calculation of dB SPL values of vocalizations with a corresponding microphone being  
312 positioned in front of the monkey (for detail see below).

313 For two out of three uttered vocalizations, we played back noise bursts of different  
314 frequency-bands and amplitudes via a loudspeaker (MF1 Multi-Field Magnetic Speakers,  
315 Tucker-Davis Technologies, U.S.A.) positioned on top of the cage, immediately after vocal  
316 detection. Noise bursts had a duration of 4 s (including 10 ms rise times) to ensure noise  
317 perturbation throughout the first phee syllable as well as the initiation of the second syllable  
318 (**Fig. 1C**). Five different noise band conditions (broadband noise and bandpass filtered noise  
319 bands: 0.1–5.1 kHz, 5–10 kHz, 10–15 kHz, and 16–21 kHz) were played back at four

320 different amplitudes (50 dB, 60 dB, 70 dB, 80 dB) each. All 20 noise conditions were played  
321 back pseudo-randomly in blocks of 30 uttered vocalizations, resulting in 20 calls being  
322 perturbed with noise after call onset and 10 calls without noise playback remaining  
323 unaffected (control). After one block ended, a new block was generated. Noise playback  
324 generation and presentation were performed with the same custom-written software used for  
325 call detection.

326 **Data Analysis.** We programmed a custom-written GUI (Matlab, Mathworks, U.S.A.) to clock  
327 Avisoft, Noldus, and TDT recordings offline and to extract the detected calls from the  
328 recording channel with the best SNR. Vocal onset to offset were manually flagged as well as  
329 noise onset times using the aligned sono- and spectrogram of vocalizations. We used a  
330 Hanning window with a 512-window size, 1024 FFT, overlap of 25%, and temporal resolution  
331 of one millisecond. We only considered first phee syllables for calculation that were  
332 detected/perturbed within 200 ms of call onset and with a minimum duration of 800 ms.  
333 Consequently, first phee syllables that were interrupted directly after noise onset as  
334 previously reported in an earlier study [18] were excluded from further analysis. Second  
335 phee syllables were only analyzed if they had a minimum duration of 500 ms. In rare cases,  
336 call termination could not be visually detected due to overlapping noise (mostly during the 80  
337 dB SPL condition). These calls were also excluded from further analysis.

338 After labelling a call, peak frequencies of the fundamental component were automatically  
339 calculated within one-millisecond time bins (8192 FFT, 96 kHz sample rate resulting in a  
340 frequency resolution of 11.71 Hz). In cases where the SNR between the call amplitude and  
341 playback noise was not high enough for automatic fundamental peak frequency calculation,  
342 frequency trajectories were calculated by manually setting call frequencies at several time  
343 points and interpolating call frequencies in between the set values. The accuracy of manual  
344 labelling compared to automatic calculation of peak frequencies was high and median  
345 differences between both techniques below the frequency resolution used (**Fig. S1**).

346 Call amplitudes were calculated for all phee calls during which the animals did not move  
347 their heads during call production. For these calls, head positions were manually labelled by  
348 marking the two white ear tufts in the GUI (see **Fig. 1B**). Next, a perpendicular line starting  
349 at the center of the later connection was used to compute angles of the microphones  
350 indicating the monkey's relative head position. The microphone with the smallest angle to  
351 the perpendicular line was used for further calculation (**Fig. 1B**). Calls that were uttered in  
352 the rare cases where the angle between the front of the monkey's head and the microphone  
353 was more than 45 degrees were excluded from further analysis. Furthermore, phee calls that  
354 were uttered during head movements of the animal were not used for amplitude calculations  
355 and only considered for fundamental frequency calculation resulting in a larger data set for  
356 frequency analysis.

357 From the recordings of the microphone foremost in front of the animal, call amplitude  
358 trajectories (in dB SPL) were calculated using a sliding window approach (window size: 25  
359 ms; step length: 1 ms). Sound levels of the recorded playback noise were determined for all  
360 conditions and subtracted from the call amplitude measurements taken, using a modification  
361 of the spectral noise subtraction method [43]. Briefly, we first calculated an estimate for each  
362 noise band by calculating the mean of ten recordings of one noise condition for each  
363 microphone. Then, we subtracted this noise estimate in the spectral dimension from noise  
364 perturbed parts of a call (i.e., from noise onset to the end of the call) and corrected the  
365 outcome as shown in formula (1), where  $P_s(w)$  is the spectrogram of the signal and the  
366 noise,  $P_n(w)$  the spectrogram of the noise estimate and  $P'_s(w)$  the modified signal spectrum.  
367 Alpha is defined as the subtraction factor and beta as the spectral floor parameter.

$$D(w) = P_s(w) - \alpha P_n(w)$$
$$P'_s(w) = \begin{cases} D(w), & \text{if } D(w) > \beta P_n(w) \\ \beta P_n(w), & \text{otherwise} \end{cases}$$
$$\alpha \leq 1, \quad 0 < \beta \ll 1$$

368

369 Alpha and beta were calculated using the following equation:



$$\alpha = \alpha_0 - \frac{SNR}{s}$$
$$5 \leq SNR \leq 20$$

370

371 According to Berouti et al. [43], we chose  $\alpha_0 = 4$  and  $s = 20/3$  as a best fit for proper  
372 amplitude calculation. A simple empirical test verified the method; a control phee was played  
373 and recorded in the recording chamber ten times with broadband noise 70 dB SPL, ten times  
374 with a 5–10 kHz noise band and ten times under control conditions (no noise). As reported  
375 previously, differences between conditions of <1 dB can be assumed to be negligible [44]. In  
376 our case, median differences between control and both noise conditions were below 1 dB  
377 (broadband: 0.8 dB, 5–10 kHz noise band: 0.3 dB; **Figs. S2A and B**) indicating successful  
378 performance of the used method. The distance of the animal's head to the microphone was  
379 considered by adding a distance factor directly after noise subtraction to the measurements  
380 resulting in a standardized amplitude trajectory (in dB) of each call as produced 10 cm in  
381 front of the animal's head.

382 **Frequency/amplitude calculation and normalization.** Mean fundamental frequency  
383 values were obtained with a sliding window approach (window size: 10 ms, step size: 1 ms).  
384 We then calculated the mean of the fundamental frequency in a 20-5 ms time window prior  
385 to noise onset (for the noise conditions) and call detection (for the control condition) for each  
386 individual call and subtracted this value from each of the frequency values after noise onset.  
387 Finally, all values of calls in the noise conditions were normalized by subtracting the mean of  
388 the respective frequency value of the control condition. Amplitude values were calculated in  
389 a similar way. Here, we also calculated the mean amplitude for each individual call in a 20-5  
390 ms time window prior to noise onset and subtracted these values from the mean amplitude  
391 values after noise onset. According to the frequency normalization, we then normalized all  
392 amplitude values by subtracting the mean of the amplitude values from the corresponding  
393 values in the control condition. For the 180 s noise experiment, we used the calculated  
394 amplitude values as described above in *data analysis*.

395 **Phee call discrimination models.** Marmoset monkeys tend to interrupt their phee calls  
396 after the first syllable in response to noise perturbation [18]. For perturbed phee calls, we  
397 consequently assumed that a substantial number of single phees had to be interrupted  
398 double phees. Recently, it has been shown that single phees and the first syllables of double  
399 phees significantly differ in a number of call parameters, such as call frequency and duration  
400 [20]. We therefore had to find a way to distinguish single phee calls that were interrupted  
401 double phees from original single phees prior to data normalization. To address this, we  
402 used the findings of Miller and colleagues [20] that suggested that early peak frequencies  
403 and durations of phee calls are sufficient to predict whether a phee call consists out of one or  
404 two syllables. Additionally, we found that this is also true for early amplitude values of a call.  
405 We applied a quadratic classification model (MATLAB) to discriminate between single and  
406 double phees with a two-dimensional classifier for fundamental frequency analysis using 1st  
407 syllable durations and peak frequencies at 25 ms after call onset for frequency analyses  
408 (**Fig. S3**). Since we observed that early amplitude values are also a good predictor (**Fig. S4**),  
409 we used a three-dimensional classifier with call amplitude values at 25 ms after call onset as  
410 the third measure for amplitude analyses (**Fig. S4**). Basically, in a first step the mean,  $\mu_k$ ,  
411 and covariance matrix,  $\Sigma_k$ , of each class is calculated from all control values to obtain the  
412 density function of the multivariate normal at a point,  $x$ , using the following formula:

$$P(x|k) = \frac{1}{(2\pi|\Sigma_k|)^{1/2}} \exp\left(-\frac{1}{2}(x - \mu_k)^T \Sigma_k^{-1}(x - \mu_k)\right)$$

413

414 Where  $|\Sigma_k|$  is the determinant of  $\Sigma_k$ , and  $\Sigma_k^{-1}$  is the inverse matrix. Using the prior probability  
415  $P(k)$  of class  $k$  and  $P(x)$  as a normalization constant we obtain the posterior probability  
416  $\hat{P}(k|x)$  that a point  $x$  belongs to class  $k$  based on:

$$\hat{P}(k|x) = \frac{P(x|k) P(k)}{P(x)}$$

417

418 These results are then used to classify our phee calls into single and double phees by  
419 minimizing the expected classification cost using:

$$\hat{y} = \arg \min_{y=1, \dots, K} \sum_{k=1}^K \hat{P}(k|x) C(y|k)$$

420

421 Where  $\hat{y}$  is the predicted classification,  $K$  is the number of classes, and  $C(y|k)$  is the cost of  
422 classifying an observation as  $y$  when its true class is  $k$ . In total, the loss for the 2D  
423 classification was between 10.8% and 23.2% (mean:  $15.1 \pm 2.8$ ) and for the 3D classification  
424 between 6.8% and 15.7% (mean:  $12.3 \pm 1.9$ ) for each monkey.

425 **Statistical analysis.** Statistical analyses were performed with MATLAB (2016b, MathWorks,  
426 Natick, MA). We performed a two-way ANOVA to test for significant differences in shifts of  
427 fundamental call frequency and amplitude within all noise band conditions ( $\alpha = 0.05$ ,  
428 Bonferroni corrected). Effect sizes (ES) were calculated using the following formula:

$$f_p^2 = \frac{\eta_p^2}{1 - \eta_p^2}$$

429

430 Where  $f_p^2$  represents the effect size of factor  $p$  and  $\eta_p^2$  is calculated as:

$$\frac{\text{explained sum of squares of } p}{(\text{explained sum of squares of } p + \text{residual sum of squares})}$$

431

432 **Data availability.** All data needed to evaluate the conclusions in the paper are present in the  
433 paper. Additional data related to this paper may be requested from the corresponding  
434 author.

435

### **Author Contributions**

S.R.H. conceived the study; T.P. and S.R.H. designed the experiments; T.P. and J.L. conducted the experiments and performed data analyses; all authors interpreted the data and wrote the manuscript. S.R.H. provided the animals and supervised the project.

### **Acknowledgments**

We thank John Holmes for proofreading. This work was supported by the Werner Reichardt Centre for Integrative Neuroscience (CIN) at the Eberhard Karls University of Tübingen (CIN is an Excellence Cluster funded by the Deutsche Forschungsgemeinschaft within the framework of the Excellence Initiative EXC 307).

## References

1. Poldrack RA, Farah MJ. 2015 Progress and challenges in probing the human brain. *Nature* **526**, 371–379.
2. Stockhorst U, Pietrowsky R. 2004 Olfactory perception, communication, and the nose-to-brain pathway. *Physiol. Behav.* **83**, 3–11.
3. Osorio D, Vorobyev M. 2008 A review of the evolution of animal colour vision and visual communication signals. *Vision Res.* **48**, 2042–2051.)
4. Ackermann H, Hage SR, Ziegler W. 2014 Brain mechanisms of acoustic communication in humans and nonhuman primates: An evolutionary perspective. *Behav. Brain Sci.* **37**, 529–546.
5. Bradbury JW, Vehrencamp SL. 1998 *Principles of Animal Communication*.
6. Brumm H, Slabbekoorn H. 2005 Acoustic Communication in Noise. *Adv. Study Behav.* **35**, 151–209.
7. Lombard E. 1911 Le signe de l'elevation de la voix. *Ann. Mal. L'Oreille du Larynx* **XXXVII**, 101–119.
8. Hage SR, Jiang T, Berquist SW, Feng J, Metzner W. 2013 Ambient noise induces independent shifts in call frequency and amplitude within the Lombard effect in echolocating bats. *Proc. Natl. Acad. Sci. U. S. A.* **110**, 4063–4068.
9. Osmanski MS, Dooling RJ. 2009 The effect of altered auditory feedback on control of vocal production in budgerigars ( *Melopsittacus undulatus* ). *J. Acoust. Soc. Am.* **126**, 911–919.
10. Brumm H. 2006 Signalling through acoustic windows: Nightingales avoid interspecific competition by short-term adjustment of song timing. *J. Comp. Physiol. A Neuroethol. Sensory, Neural, Behav. Physiol.* **192**, 1279–1285.
11. Luo J, Goerlitz HR, Brumm H, Wiegrebe L. 2015 Linking the sender to the receiver: Vocal adjustments by bats to maintain signal detection in noise. *Sci. Rep.* **5**, 1–11.
12. Brumm H, Zollinger A. 2011 The evolution of the Lombard effect: 100 years of psychoacoustic research. *Behaviour* **148**, 1173–1198.
13. Luo J, Hage SR, Moss CF. 2018 The Lombard Effect: From Acoustics to Neural Mechanisms. *Trends Neurosci.* **41**, 938–949.
14. Roy S, Miller CT, Gottsch D, Wang X. 2011 Vocal control by the common marmoset in the presence of interfering noise. *J. Exp. Biol.* **214**, 3619–3629.
15. Zelick RD, Narins PM. 1982 Analysis of acoustically evoked call suppression behaviour in a neotropical treefrog. *Anim. Behav.* **30**, 728–733.
16. Eliades SJ, Wang X. 2012 Neural correlates of the lombard effect in primate auditory cortex. *J. Neurosci.* **32**, 10737–48.

17. Brumm H. 2004 Acoustic communication in noise: regulation of call characteristics in a New World monkey. *J. Exp. Biol.* **207**, 443–448.
18. Pomberger T, Risueno-Segovia C, Löschner J, Hage SR. 2018 Precise Motor Control Enables Rapid Flexibility in Vocal Behavior of Marmoset Monkeys. *Curr. Biol.* **28**, 788–794.e3.
19. Miller CT, Flusberg S, Hauser MD. 2003 Interruptibility of long call production in tamarins: implications for vocal control. *J. Exp. Biol.* **206**, 2629–2639.
20. Miller CT, Eliades SJ, Wang X. 2009 Motor planning for vocal production in common marmosets. *Anim. Behav.* **78**, 1195–1203.
21. Egnor SER, Iguina CG, Hauser MD. 2006 Perturbation of auditory feedback causes systematic perturbation in vocal structure in adult cotton-top tamarins. *J. Exp. Biol.* **209**, 3652–3663.
22. Agamaite JA, Chang C-J, Osmanski MS, Wang X. 2015 A quantitative acoustic analysis of the vocal repertoire of the common marmoset (*Callithrix jacchus*). *J. Acoust. Soc. Am.* **138**, 2906–2928.
23. Pistorio AL, Vintch B, Wang X. 2006 Acoustic analysis of vocal development in a New World primate, the common marmoset (*Callithrix jacchus*). *J. Acoust. Soc. Am.* **120**, 1655–1670.
24. Zürcher Y, Burkart JM. 2017 Evidence for Dialects in Three Captive Populations of Common Marmosets (*Callithrix jacchus*). *Int. J. Primatol.* **38**, 780–793.
25. Egnor SR, Hauser M. 2006 Noise-induced vocal modulation in cotton-top tamarins (*Saguinus oedipus*). *Am. J. Primatol.* **68**, 1183–1190.
26. Schuster S, Zollinger SA, Lesku JA, Brumm H. 2012 On the evolution of noise-dependent vocal plasticity in birds. *Biol. Lett.* **8**, 913–916.
27. Bermúdez-Cuamatzin E, Ríos-Chelén AA, Gil D, Garcia CM. 2011 Experimental evidence for real-time song frequency shift in response to urban noise in a passerine bird. *Biol. Lett.* **7**, 36–38.
28. Nemeth E, Brumm H. 2010 Birds and Anthropogenic Noise: Are Urban Songs Adaptive? *Am. Nat.* **176**, 465–475.
29. Pohl NU, Leadbeater E, Slabbekoorn H, Klump GM, Langemann U. 2012 Great tits in urban noise benefit from high frequencies in song detection and discrimination. *Anim. Behav.* **83**, 711–721.
30. Halfwerk W, Slabbekoorn H. 2009 A behavioural mechanism explaining noise-dependent frequency use in urban birdsong. *Anim. Behav.* **78**, 1301–1307.
31. Pohl NU, Slabbekoorn H, Klump GM, Langemann U. 2009 Effects of signal features and environmental noise on signal detection in the great tit, *Parus major*. *Anim. Behav.* **78**, 1293–1300.

32. Luo J, Kothari NB, Moss CF. 2017 Sensorimotor integration on a rapid time scale. *Proc. Natl. Acad. Sci.* **114**, 6605–6610.
33. Kobayasi KI, Okanoya K. 2003 Context-dependent song amplitude control in Bengalese finches. *Neuroreport* **14**, 521–524.
34. Pick HL, Siegel GM, Fox PW, Garber SR, Kearney JK. 1989 Inhibiting the Lombard effect. *J. Acoust. Soc. Am.* **85**, 894–900.
35. Therrien AS, Lyons J, Balasubramaniam R. 2012 Sensory Attenuation of Self-Produced Feedback: The Lombard Effect Revisited. *PLoS One* **7**, e49370.
36. Vinney LA, van Mersbergen M, Connor NP, Turkstra LS. 2016 Vocal Control: Is It Susceptible to the Negative Effects of Self-Regulatory Depletion? *J. Voice* **30**, 638.e21-638.e31.
37. Ghazanfar AA, Liao DA, Takahashi DY. 2019 Volition and learning in primate vocal behaviour. *Anim. Behav.* , 1–9.
38. Choi JY, Takahashi DY, Ghazanfar AA. 2015 Cooperative vocal control in marmoset monkeys via vocal feedback. *J. Neurophysiol.* **114**, 274–283.
39. Liao DA, Zhang YS, Cai LX, Ghazanfar AA. 2018 Internal states and extrinsic factors both determine monkey vocal production. *Proc. Natl. Acad. Sci.* **115**, 201722426.
40. Eliades SJ, Tsunada J. 2018 Auditory cortical activity drives feedback-dependent vocal control in marmosets. *Nat. Commun.* **9**, 2540.
41. Hage SR, Nieder A. 2016 Dual Neural Network Model for the Evolution of Speech and Language. *Trends Neurosci.* **39**, 813–829.
42. Hage SR. 2019 Precise vocal timing needs cortical control. *Science.* **363**, 926–928.
43. Berouti M, Schwartz R, Makhoul J. 1978 Enhancement of speech corrupted by acoustic noise. In *ICASSP '79. IEEE International Conference on Acoustics, Speech, and Signal Processing*, pp. 208–211.
44. Brumm H, Schmidt R, Schrader L. 2009 Noise-dependent vocal plasticity in domestic fowl. *Anim. Behav.* **78**, 741–746.

## Figures

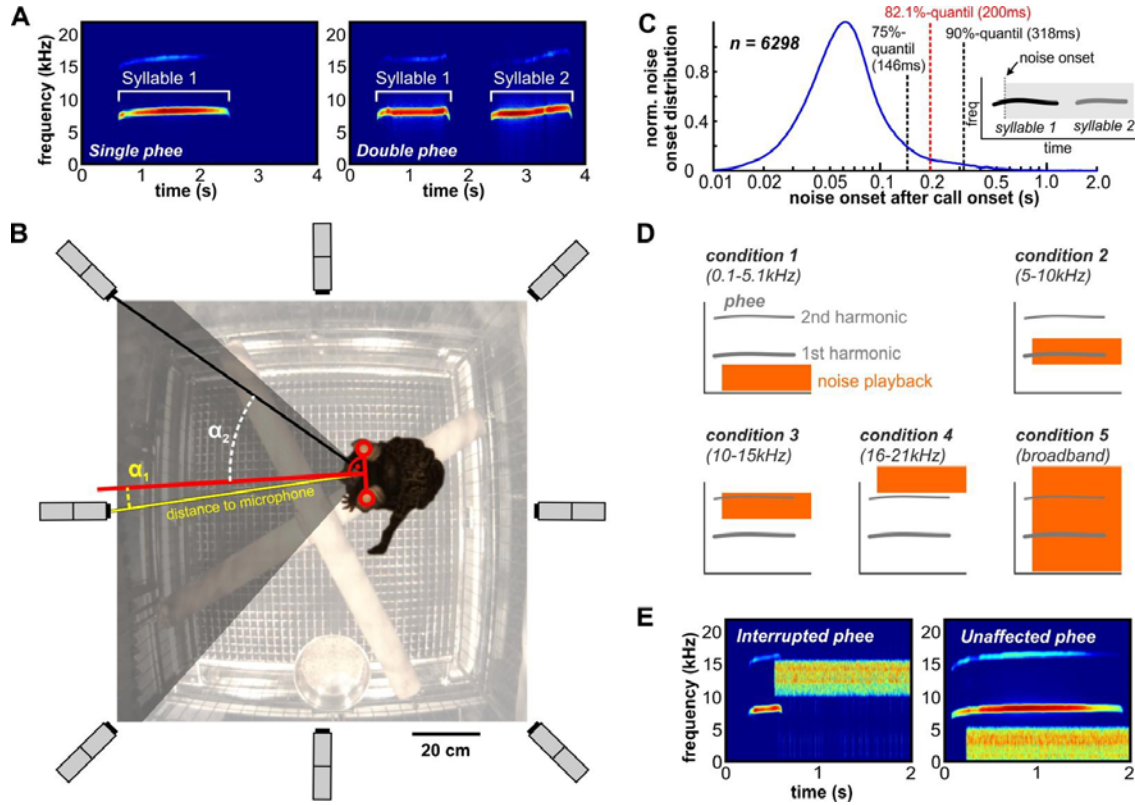

**Figure 1: Experimental setup and design.** (A) Exemplary spectrograms of single and double phee calls. (B) The vocal behavior of monkeys was recorded in a soundproof chamber. The behavior was continuously monitored and recorded. The red line shows the monkey's head position in relation to the two closest microphones (yellow and black line). The acoustic signal recorded with the microphone closest to being directly in front of the monkey's head (i.e., the smallest angle between the monkey's perpendicular and the microphone) was used for amplitude calculation. (C) Relative vocal detection distribution over time (s). (D) Noise condition overview with masking properties. (E) Exemplary spectrograms of an interrupted single phee (10–15 kHz noise condition) and unaffected phee (0.1–5 kHz noise condition).



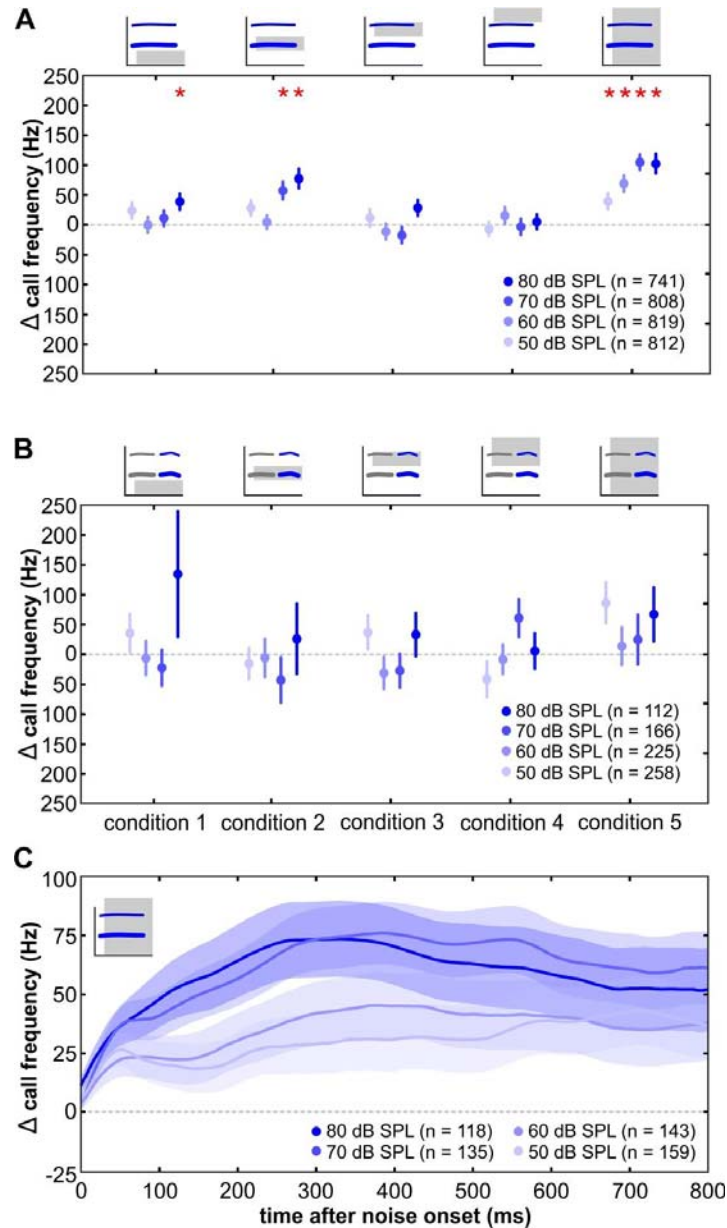

**Figure 2: Increasing frequency shifts in response to noise bursts.**  $\Delta$  call frequency (Hz) per corresponding noise condition normalized to control data (dashed lines). Mean of median frequencies after noise onset of each call pooled over all monkeys  $\pm$  SEM (**A**) for first phee syllables 0–800 ms after noise onset (**B**) for second phee syllables 100–400 ms after second syllable onset. (**C**): First syllables mean  $\Delta$  call frequency courses (Hz)  $\pm$  SEM of all amplitude conditions during broadband noise over time after noise onset (ms). Asterisks denote significant differences.

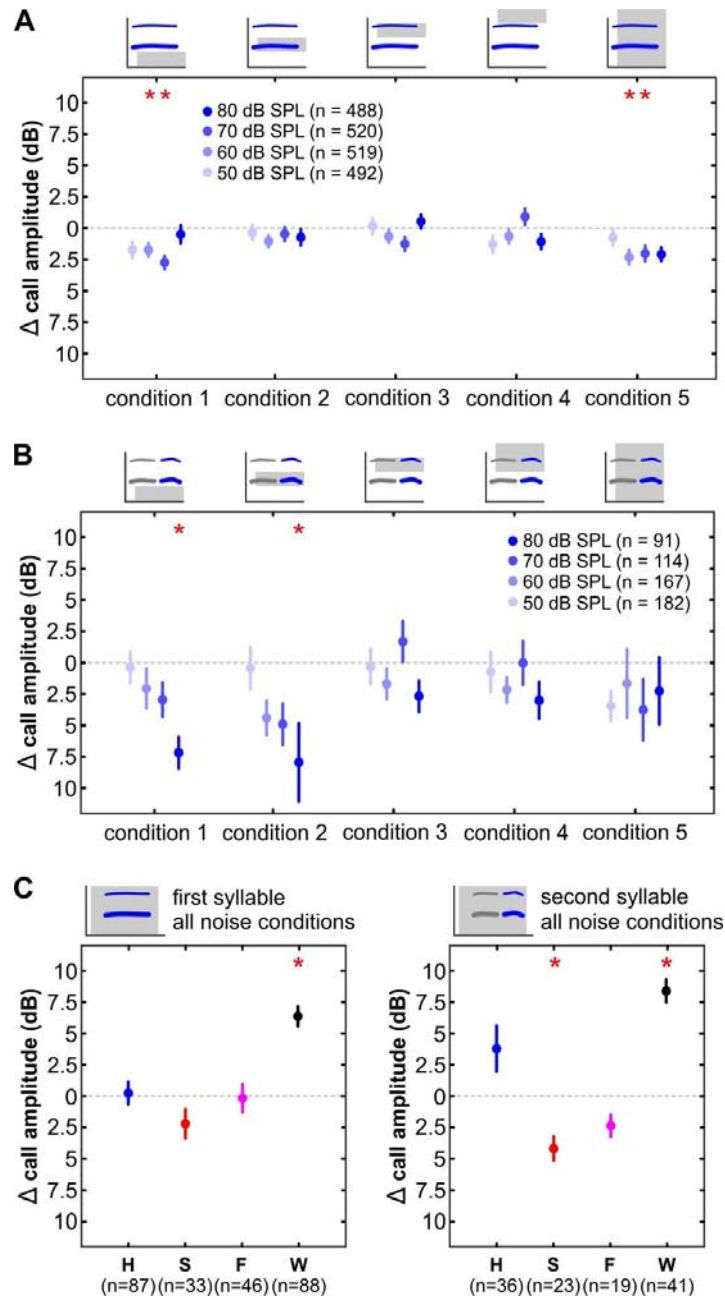

**Figure 3: Decreasing amplitude shifts in response to noise bursts.**  $\Delta$  call amplitude (dB) per corresponding noise condition normalized to control data (dashed lines). Mean of median amplitudes after noise onset of each call pooled over all monkeys  $\pm$  SEM (A) for first phee syllables and (B) for second phee syllables. Over all noise conditions pooled max  $\Delta$  amplitudes (dB)  $\pm$  SEM during 180 s noise per monkey (C) for first syllables and (D) for second syllables. Asterisks denote significant differences.

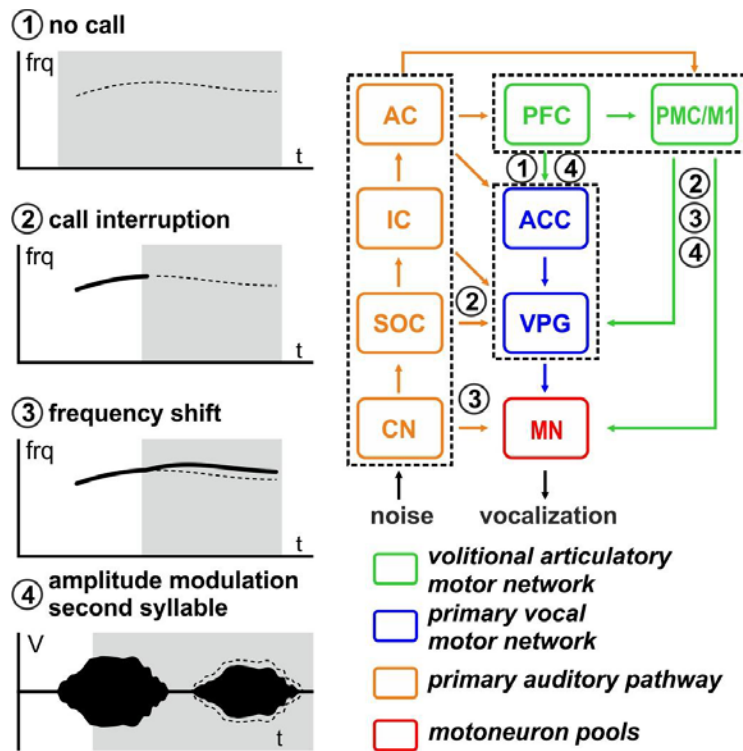

**Figure 4: Hypothetical neuronal model for audio-vocal interaction.** Call production might be affected by ambient noise at different brain levels. Audio-vocal integration mechanisms are known to happen between cortical and subcortical structures as well as via corticofugal projections. See text for further explanation.

## Supplemental Figures

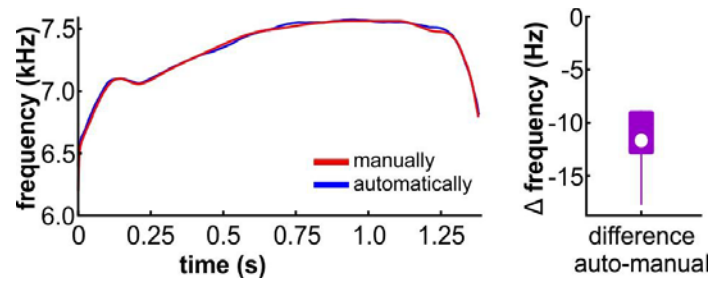

**Figure S1: Comparison of automatically vs manually marked calls.** (A) Frequency course (Hz) over time (ms) of a manually (blue) and automatically (red) marked example phoe call. (B) Mean  $\Delta$  frequencies of automatically-manually marked calls.

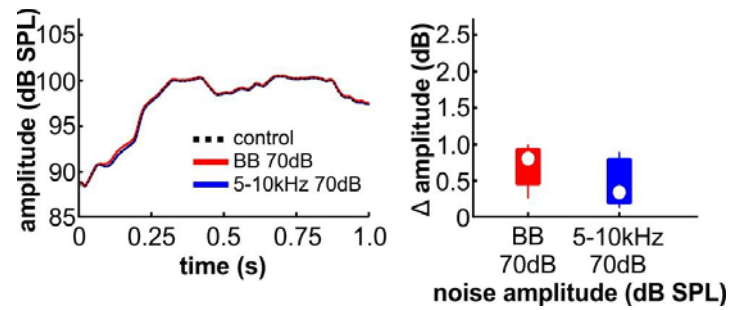

**Figure S2: Test for noise subtraction accuracy.** (A) Mean amplitude courses (dB SPL) for both 70 dB overlapping noise conditions (5–10 kHz, blue; broadband, red) as well as for the control (no noise, black dashed) of 10 test phees over time (ms). (B) Maximum  $\Delta$  amplitude (dB) compared to control calls of 70 dB broadband and 5–10 kHz noise conditions.

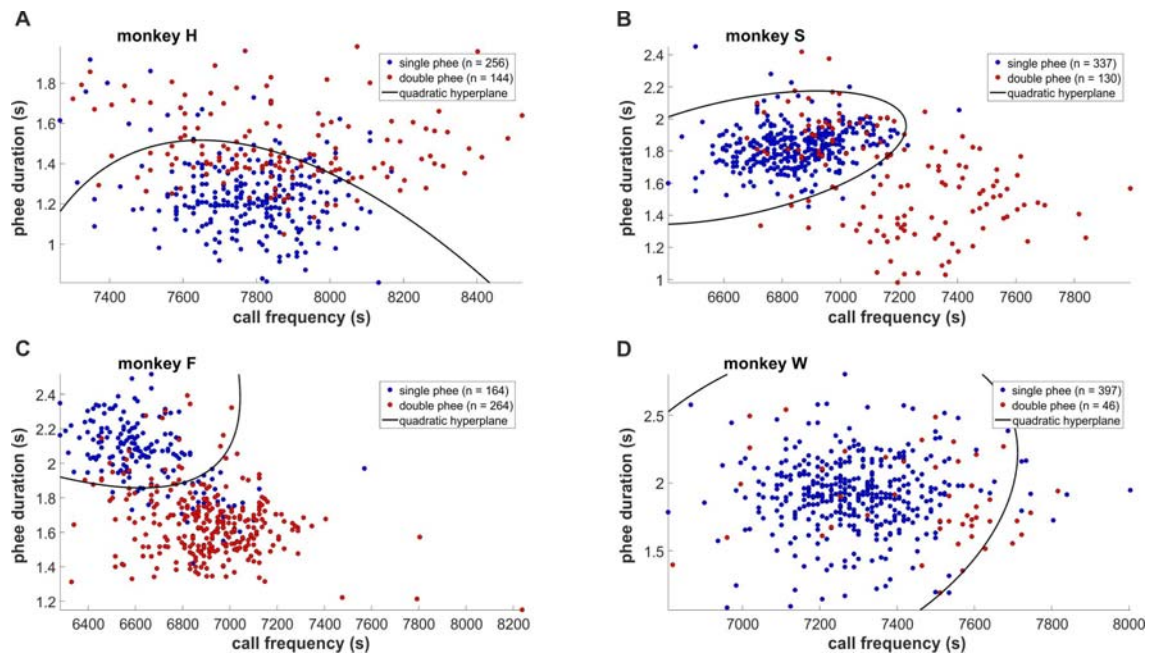

**Figure S3: Single-double phee discrimination with a two-dimensional classifier.** For single-double phee discrimination, first syllable fundamental peak frequencies (Hz) at 25 ms after call onset and corresponding phee durations (s) were used.

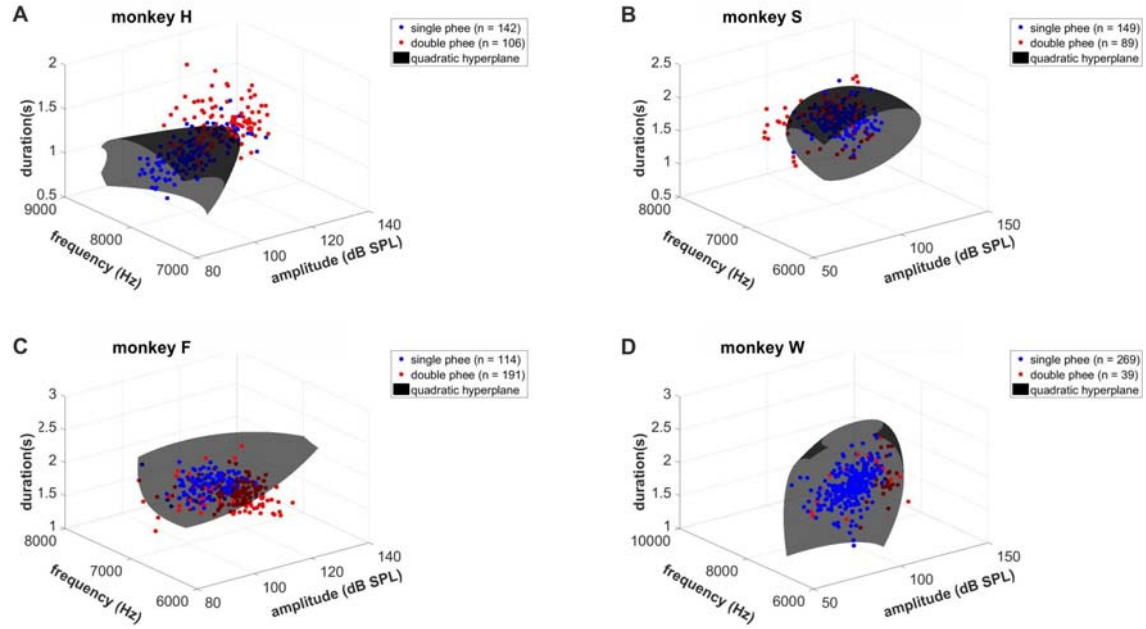

**Figure S4: Single-double phee discrimination with a three-dimensional classifier.** For single-double phee discrimination, first syllable fundamental peak frequencies (Hz), as well as amplitudes (dB SPL) at 25 ms after call onset and corresponding phee durations (s), were used.

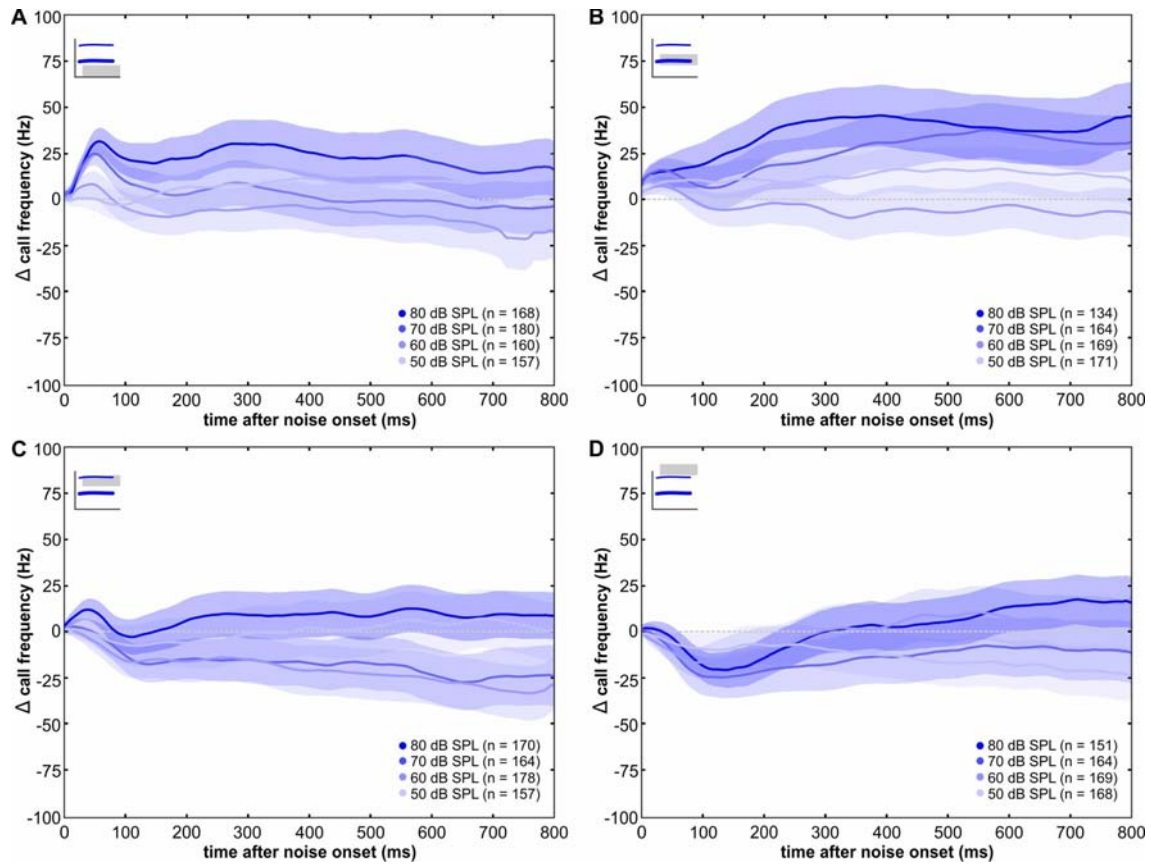

**Figure S5: Frequency courses in response to noise bursts.** First syllables mean  $\Delta$  frequency courses (Hz)  $\pm$  SEM of all amplitude conditions normalized to control data (dashed lines) during (A) 0.1–5.1 kHz, (B) 5–10 kHz, (C) 10–15 kHz, and (D) 16–21 kHz noise conditions over time after noise onset (ms).



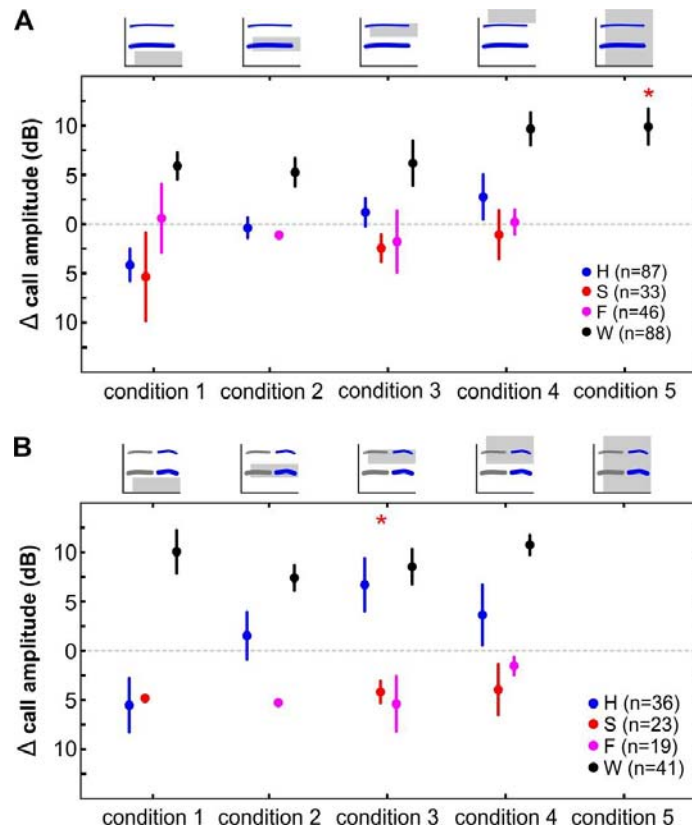

**Figure S6: Amplitude shifts in response to noise bursts.** Pooled maximum  $\Delta$  amplitudes (dB)  $\pm$  SEM during 180 s noise per monkey per noise condition normalized to control data (dashed lines) (**A**) for first syllables and (**B**) for second syllables. Asterisks denote significant differences.
